# Supplementary material for: QuTILs: Open-Source Image-Based Infiltrating Immune Cell Detection for Research Application
Source: Research Square preprint supplement (doi:10.21203/rs.3.rs-9535059/v1), 2026-05-14
Supplement: Supplementary file 1 [file 4a79d58c645a7d81ba7d2a57.docx]

***QuTILs: Open-Source Image-Based Infiltrating Immune Cell Detection and Outcomes in Breast Cancer Clinical Trials***

Mark Vater1, Roberto Salgado2, Elijah Blige1,3, Heather Lefebvre1,3, Ava Strahan1,3, Margaret Gatti-Mays1,3,4, Hope S. Rugo, MD5, Karla Ballman, PhD6, Mark Watson, MD, PhD7, Yujia Wen, PhD8, Roberto Leon-Ferre9, Khalid Niazi10, W. Fraser Symmans, MD11, Lisa A. Carey, MD12, Khalid AbdulJabar13, Zaibo Li3,9, Daniel G. Stover1,3,4

**Supplement: Detailed Methods**

*QuTILs Model Development*

For the construction of QuTILs, algorithmically detected and labeled TILs from 127 slide images in the PanopTILs dataset were used as training data, with manual annotations in 19 images reserved for testing and validation. The training data were then supplemented with 33 non-overlapping images with TIL hotspot annotations from the Saltz et al. dataset to provide greater abundance and diversity of TILs, resulting in a total training set of 200,435 TILs and 564,814 tumor, stromal, and other cells and a total independent validation set of 3,224 TILs and 7,360 tumor, stromal, and other cells (32). Because the Saltz et al. dataset is derived of community-level TIL density maps, there were no ground truth cell-level annotations accompanying this dataset; thus, this dataset was considered only as a training supplement for community-level features in QuTILs.

*QuTILs Workflow*

Using a simple threshold, tissue regions were first segmented from whitespace background, such that the region of interest (ROI) consisted of all available tissue (**Fig 1A-B**). The tissue ROI was divided into large tiles (approximately 4000×4000 µm) for batch processing. Each tile was then processed for cell identification and classification. Cell detection was performed via the QuPath watershed cell detection plugin (pixel size: 0.5 µm; background radius: 8 µm; sigma: 1.5 µm; minimum area: 10 µm2; maximum area: 400 µm2; cell expansion: 5 µm) (**Fig 1C**). Detected cell objects were accompanied by calculation of shape and size features. Haralick texture and intensity features were then applied to cell objects (preferred pixel size: 1 µm; region: cell nucleus; tile diameter: 10 µm; Haralick distance: 1 µm; number of bins: 32) in H&E stain channels (36). All features were then smoothed at 20 µm and 40 µm radius from the cell centroid, such that every existing feature was averaged in the neighborhood directly around the cell. Cells are then classified by the QuTILs model and counted based on classification (TIL vs. tumor, stromal, or other class) in each tile based on the underlying tissue annotation, yielding total TIL measurements (**Fig 1D-E**). A measure of spatial clustering was also implemented based on the Getis-Ord Gi* statistic to identify statistically significant TIL-dense tiles, described below (**Fig 1F**).

To approximate IOWG sTIL determinations, the border of the largest contiguous tumor regions, identified by density of classified tumor cells, were expanded and dilated by 500 µm to simulate the 1-mm invasive marginal region evaluated manually by pathologists (**Fig 1G**) (4). Cells were recorded by classification resulting in TIL measurements residing in the invasive margin.

*QuTILs Metrics*

In order to benchmark common metrics for estimating TILs, multiple TIL estimation methods were evaluated: 1) total TILs % measurement representing the percentage of total cells identified per slide that were classified as TILs; 2) marginal TILs % representing the percentage of cells in the stromal-tumor boundary (**Fig 1G**) classified as TILs; and the Getis-Ord Gi* statistic, a measure of spatial TILs, based on recent reports from IOWG, for evaluating the statistical likelihood of an area in an image belonging to a cluster based on underlying features of interest (37). This statistic is calculated by:

where *S* and *U* are normalization components calculated as:

for which is the total amount of tiles covering the tissue ROI; is the TIL count for each tile; is the mean TIL count over tiles; and is a binary operator defined by 1 if is a neighboring tile of , and 0 if not (38, 39). For TILs, this means that in a set of evenly spaced and identical tiles covering a tissue ROI, TIL counts for each tile and its neighboring tiles are compared against the total mean TILs in the image and scored relative to the normal (expected) distribution. The tile size (50×50 µm) and order of neighboring tiles (up to fourth-order neighbors from tile ) were chosen based on previous implementations of the Getis-Ord statistic for BC and lung carcinoma in H&E images (39, 40).

*Clinical Analysis*

Percent TILs across the whole slide and in the invasive margin were chosen to represent estimated TILs in Cox models. To better elucidate the impact of percent TILs, the predictor was binned by decile. Available outcomes data included OS (CALGB 40502) and EFS times (CALGB 40603). All clinical analyses were conducted in R (version 4.4.0) using the survival package (41, 42). For survival analysis, median survival (for which 50% of the group experienced the event) was reported if reached; otherwise, the Chi-square test statistic was reported.

*RNA Sequencing and Immune Deconvolution*

Whole-transcriptome analyses by messenger RNA-seq were performed in the University of North Carolina High-Throughput Sequencing Facility and analyzed by the university’s Lineberger Comprehensive Cancer Center Bioinformatics Core. The RNA-seq libraries were made from total RNA with the TruSeq (Illumina) messenger RNA kit and were sequenced on an Illumina HiSeq 2000 using a 2 × 50-base pair configuration. The CALGB 40603 trial RNA-seq FASTQ files are available in dbGAP repositories (phs000178 and phs001570, respectively). The CALGB 40502 RNA-seq FASTQ files are available on Allliance Standardized Translational Omics Resource (ASTOR). Purity-filtered reads were aligned to the human reference GRCh38/hg38 genome, using Spliced Transcripts Aligned to a Reference, version 2.4.2a.28 Transcript (GENCODE, version 22); abundance estimates were generated by Salmon, version 0.6.029 in “-quant” mode, based on the Spliced Transcripts Aligned to a Reference alignment. Raw read counts for all RNA-seq samples were normalized to a fixed upper quartile. Messenger RNA-seq-normalized gene counts were then log2 transformed, and genes were filtered for those expressed in 70% of samples. Several prominent immune deconvolution methods were selected for this analysis – TIMER, CIBERSORTx, quanTIseq, XCELL, EPIC, ABIS, ConsesusTME, ESTIMATE, and ImmuCellAI – which were inferred directly from gene expression profiles from each sample (48-49,52-59). Immune subtype profiles for each sample based on transcript per million (TPM) normalized gene abundance were generated by utilizing the TIMER 3.0 web portal (52, 53). Specific immune cell phenotypes in this analysis included B cell, CD8+ T cell, macrophage, natural killer (NK) cells, all produced by the methods included in the TIMER 3.0 web package (48-49, 52-59). For analysis, resulting immune phenotype estimates were individually compared with survival for both cohorts in univariable Cox’s proportional hazards models, with significance values adjusted by Bonferroni correction to account for false discovery rate in multiple testing. Overlapping immune phenotype estimations across both CALGB 40502 and 40603 among the top 15 and bottom 15 results based on univariable hazard ratio were additionally tested in Cox models alongside image-based TIL estimates to assess possible enrichment of survival models including both data modalities.
